# Supplementary material
Source: publisher site journal article supplement (https://static.cambridge.org/content/id/urn:cambridge.org:id:article:S0790966720000270/resource/name/S0790966720000270supp001.docx)
Supplement: Supplementary file 1 [file S0790966720000270supp001.docx]

**Supplementary material** *Sample of data obtained regarding topics relevant to pregnancy or breastfeeding and amount of consideration given to same in policies.*

| Name of policy | Key area of consideration | Superficial consideration pregnancy | Extensive consideration pregnancy | No consideration pregnancy | Key topics related to pregnancy |
| --- | --- | --- | --- | --- | --- |
| Sodium valproate | Valproate prescription and monitoring |  | X |  | Pregnancy prevention  Teratogenicity and prevention  Informed consent |
| Lithium | Lithium prescription and monitoring |  | X |  | Teratogenic risk  Contraception  Pre-conceptual planning  Monitoring in pregnancy -foetal echo |
| Religion and cultural diversity | Staff education | X |  |  | As relating to muslim women and Ramadan |
| Physical restraint | Management of pregnant woman requiring physical restraint |  |  | X | Best practice guidelines  Risk to mother  Risk to foetus |
| Clozapine | Prescription and monitoring |  |  | X | Teratogenicity  Risk to mother  Pre-conceptual advice |
| Name of policy | Key area of consideration | Superficial consideration Breastfeeding | Extensive consideration breastfeeding | No consideration breastfeeding | Key topics related to breastfeeding |
| Lithium | Maternal use while BF |  | X |  | Advice for mother  Risks vs benefit  Best practice |
| Practice standards for nurses and midwives with prescribing authority | Prescribing for breastfeeding women | X |  |  | Advice for mother  Risks vs benefit  Best practice |
| Clostridium difficile | Risks to infant during infection and treatment | X |  |  | Advice for mother  Risks vs benefit  Best practice |
| Sodium valproate | Maternal use if BF |  |  | X | Advice for mother  Risks vs benefit  Best practice |
| Clozapine | Maternal use if BF |  |  | X | Advice for mother  Risks vs benefit  Best practice |
